# Supplementary material
Source: PubMed Central journal article supplement (PMC4091170)
Supplement: auto-10-1093-s01.pdf [file auto-10-1093-s01.pdf]

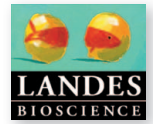

## **Supplemental Material to:**

**Hana Popelka, Vladimir N Uversky, and Daniel J Klionsky**

**Identification of Atg3 as an intrinsically disordered polypeptide yields insights into the molecular dynamics of autophagy-related proteins in yeast**

**Autophagy 2014; 10(6)**

**<http://dx.doi.org/10.4161/auto.28616>**

**[www.landesbioscience.com/journals/autophagy/article/28616](http://www.landesbioscience.com/journals/autophagy/article/28616)**

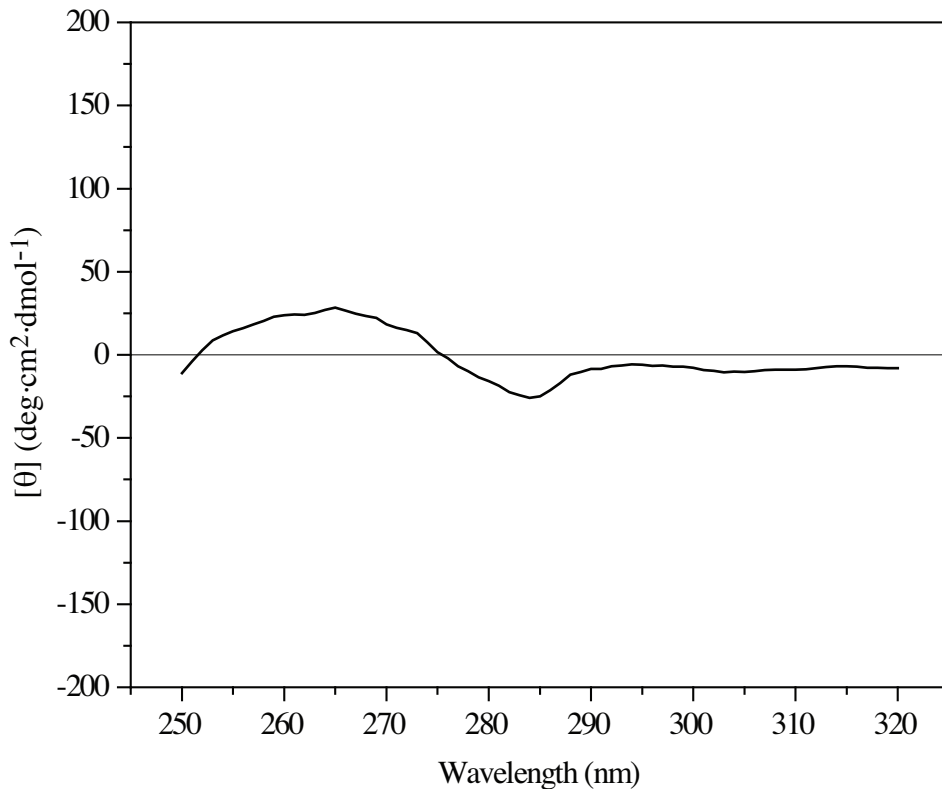

**Figure S1.** Near-UV CD spectrum (protein solution minus buffer) of Atg3 at 25 °C in 50 mM potassium buffer, pH 8.0. The spectrum is the average of 10 scans. Experimental conditions were as follows: time constant, 1 s; bandwidth, 1 nm; path length, 10 mm; sample volume, 1 ml.

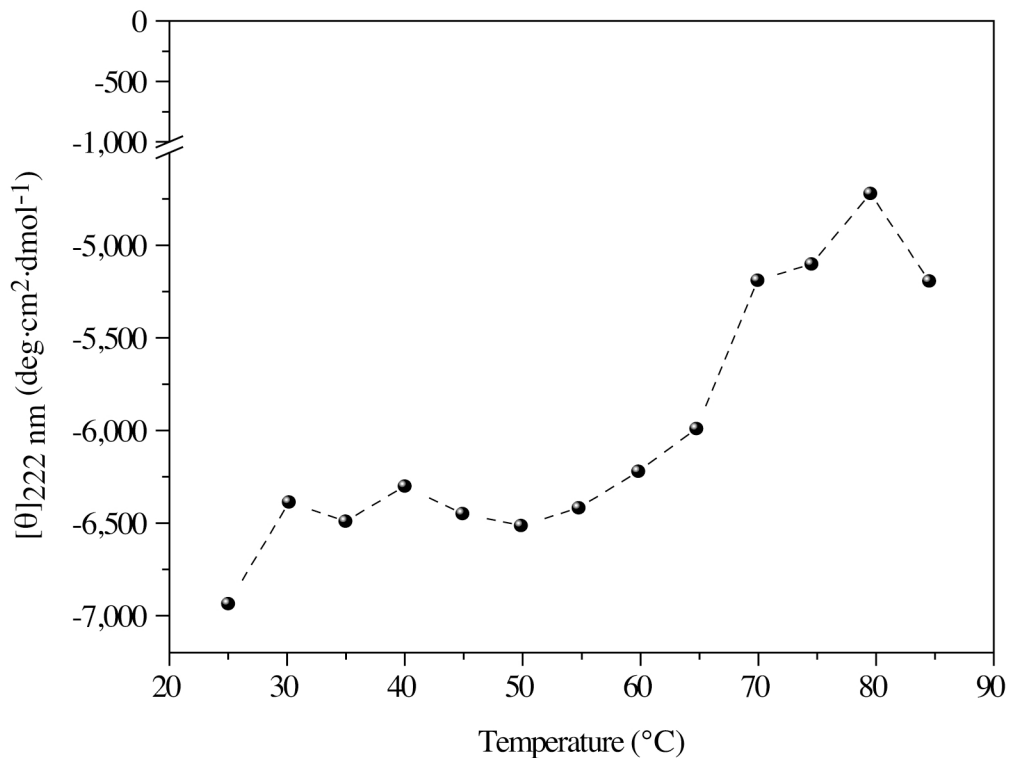

**Figure S2.** Melting curve (protein solution minus buffer) of Atg3. An increase in mean residue ellipticity at 222 nm ( $[\theta]_{222 \text{ nm}}$ ) monitors the loss of the  $\alpha$ -helical secondary structure element during heating. Experimental conditions were as follows: time constant, 1s; bandwidth, 1 nm; path length, 1 mm; sample volume, 300  $\mu$ l; temperature step, 5°C; temperature dead band, 0.5°C; temperature equilibration time, 0.1 min.

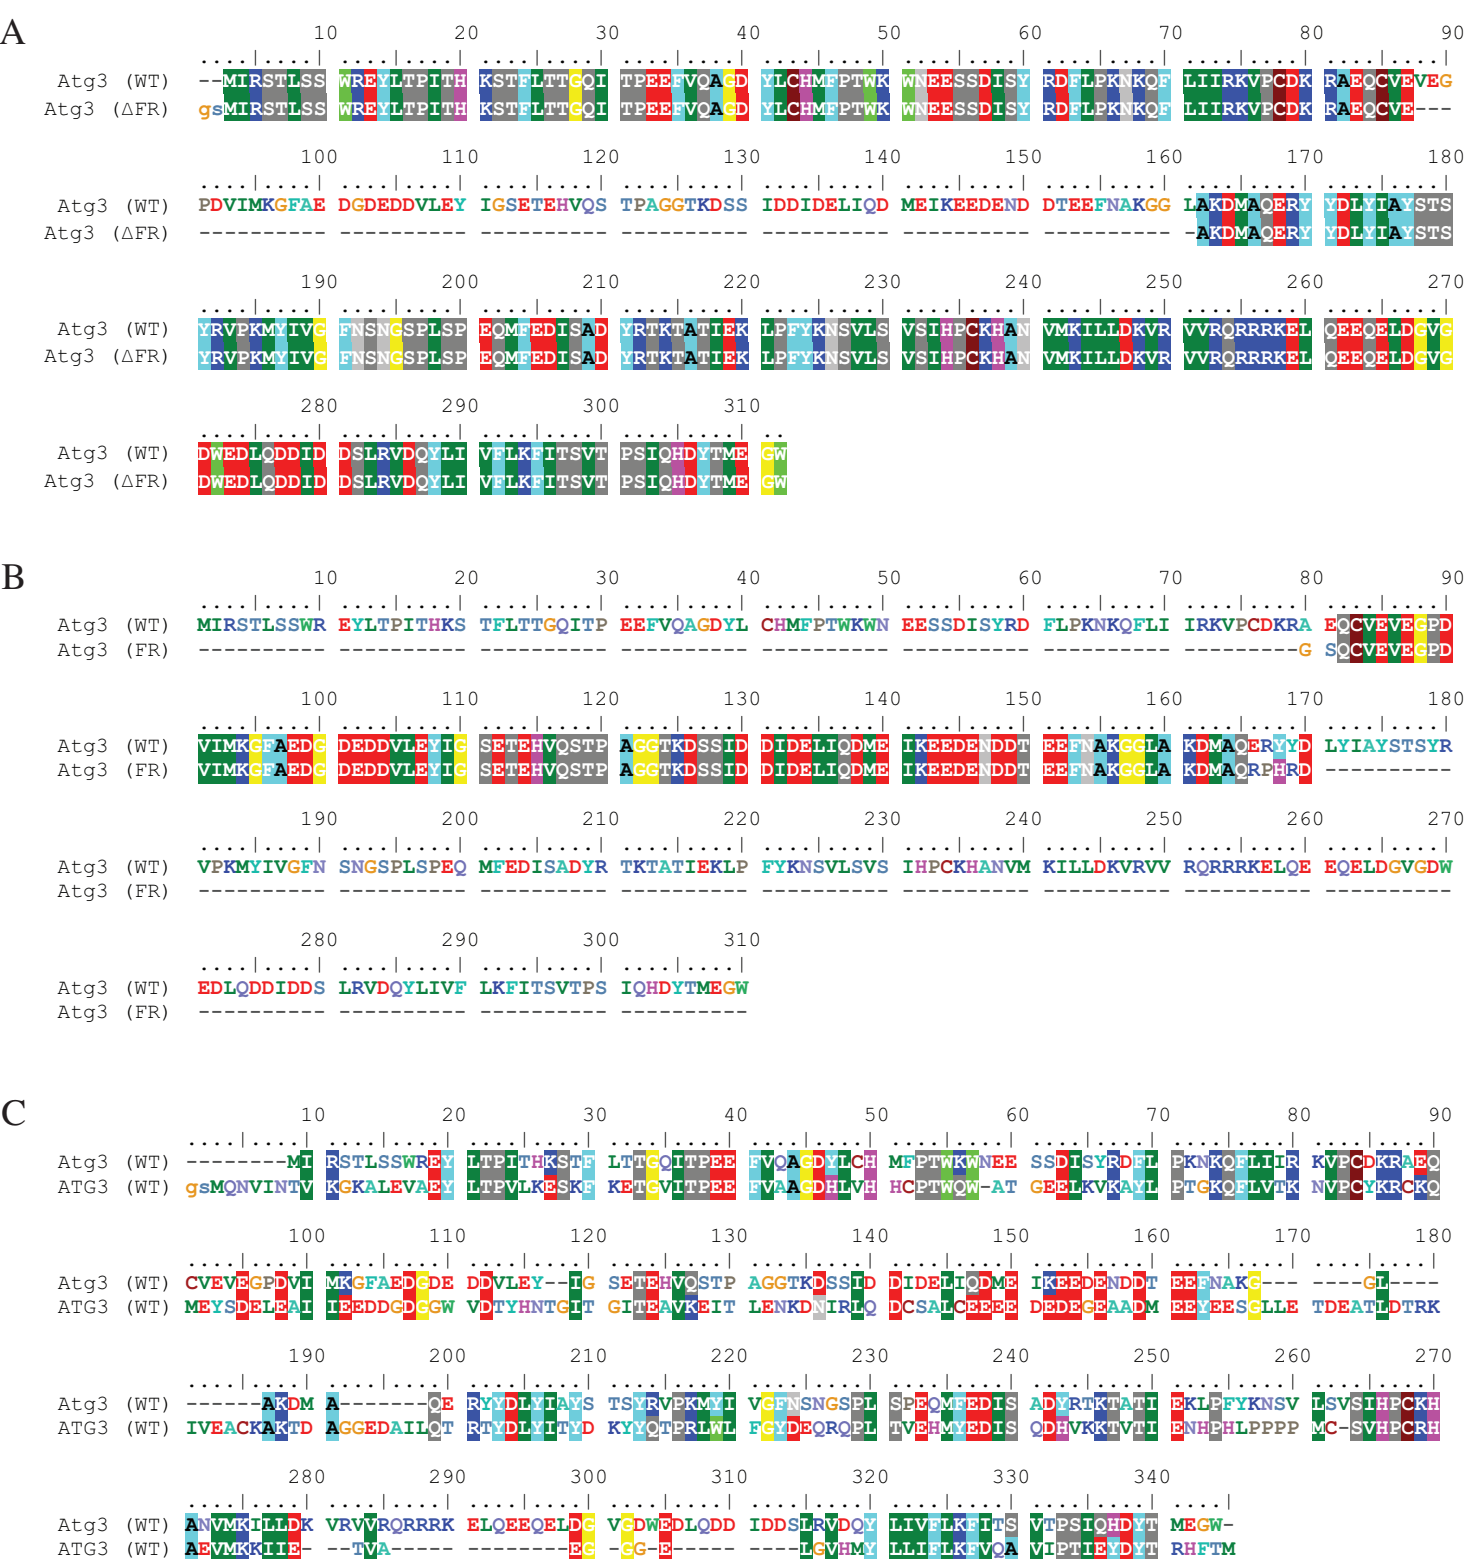

**Figure S3.** Amino acid sequence alignments between wild type and the  $\Delta$ FR deletion mutant of Atg3 from yeast (A), wild-type and the recombinant FR fragment of Atg3 from yeast (B), and wild-type Atg3/ATG3 proteins from yeast and human (C). The alignment was created in the BioEdit Sequence Alignment Editor.<sup>1</sup>

### Supplemental reference

1. Hall TA. BioEdit: a user-friendly biological sequence alignment editor and analysis program for Windows 95/98/NT. *Nucleic Acids Symp.* 1999; 41:95-8.

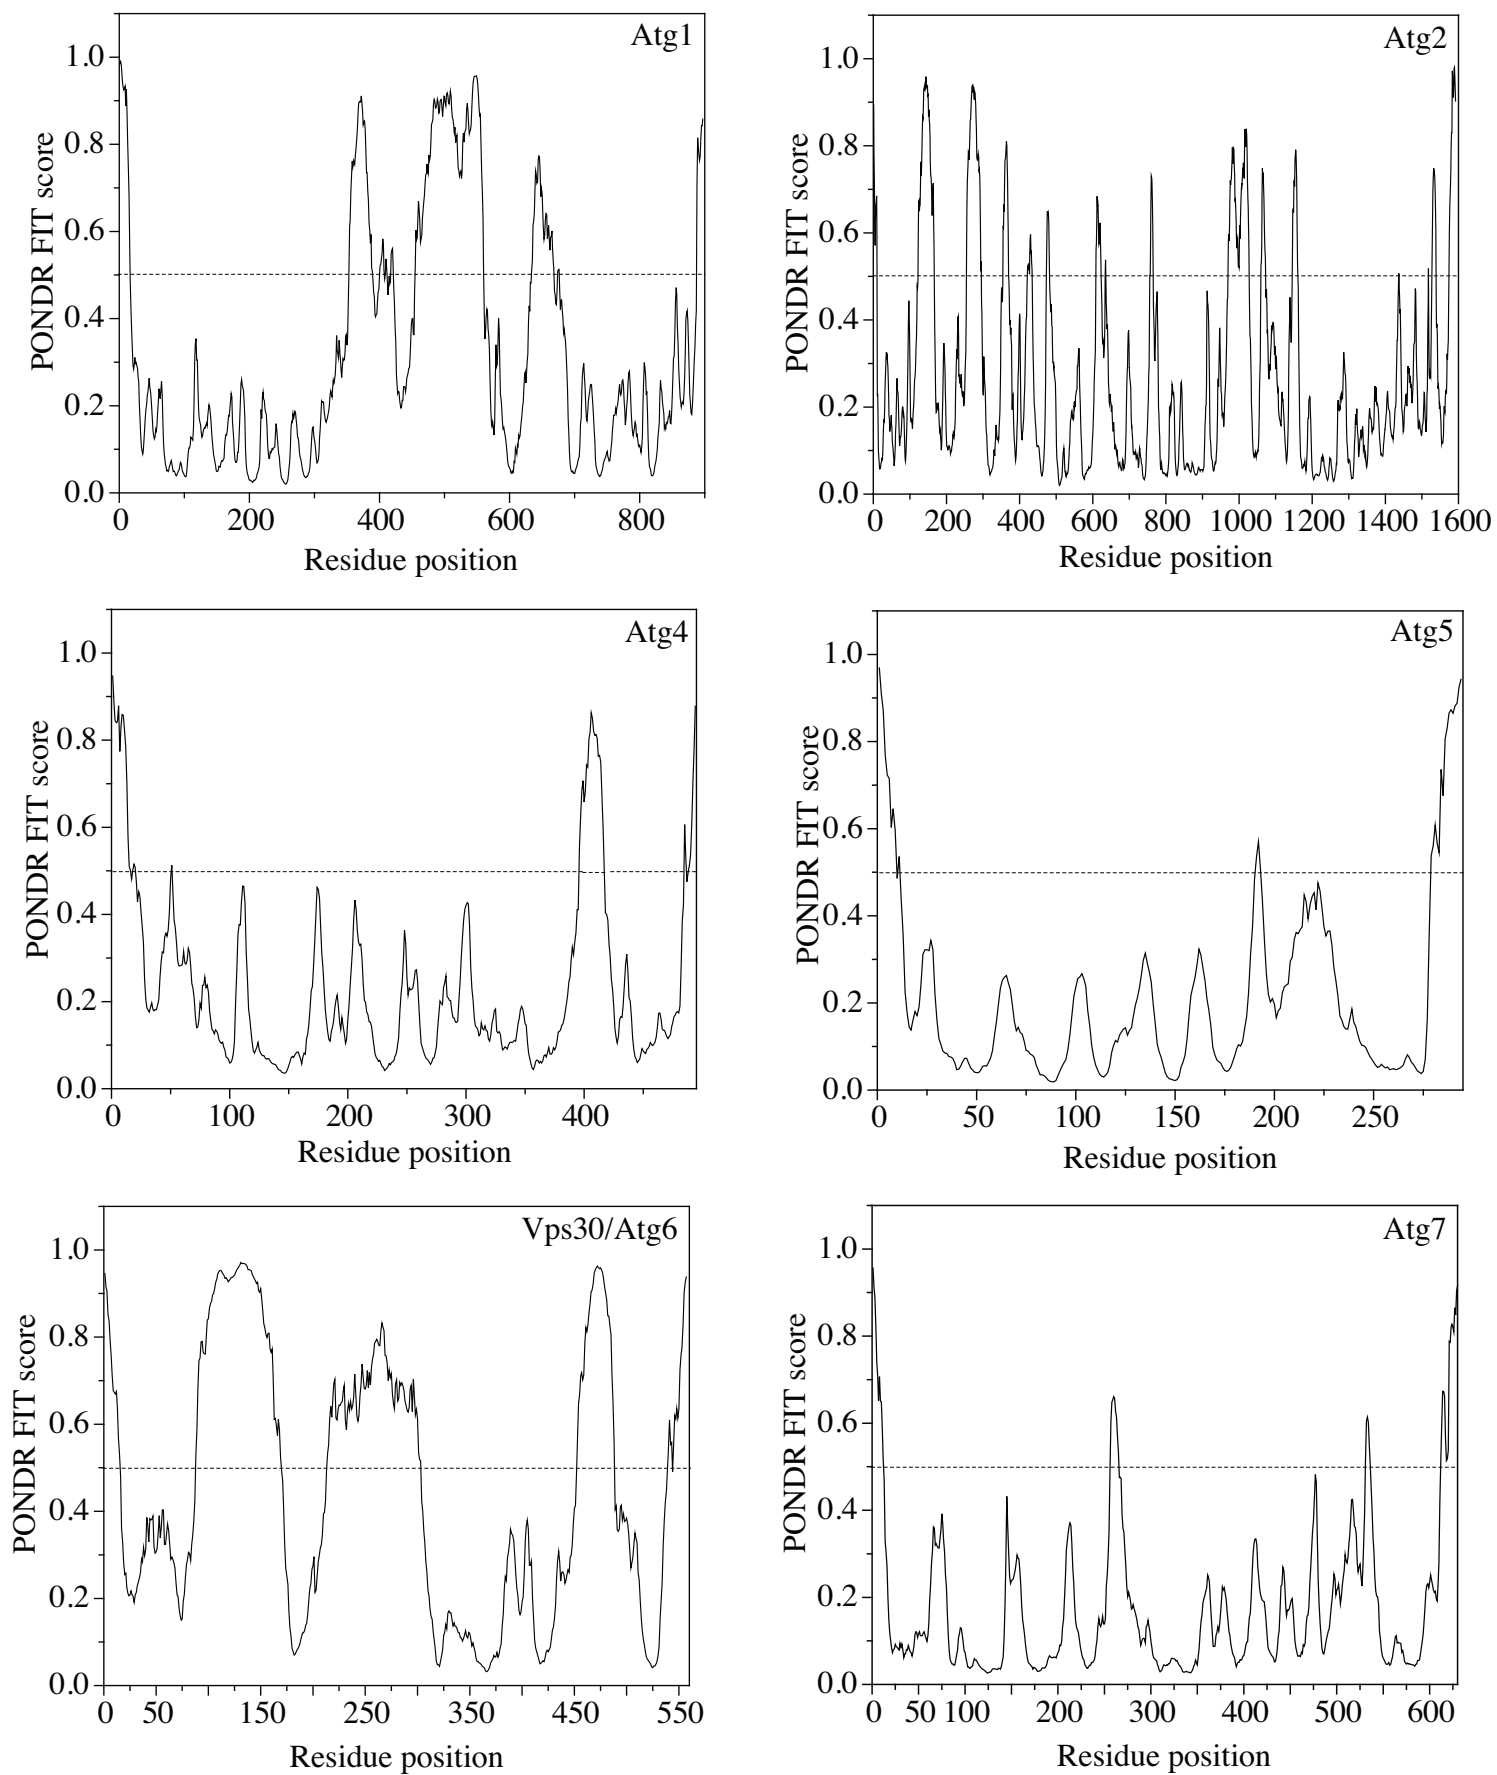

**Figure S4.** PONDR-FIT analysis of yeast Atg1, Atg2, Atg4, Atg5, Vps30/Atg6, and Atg7.

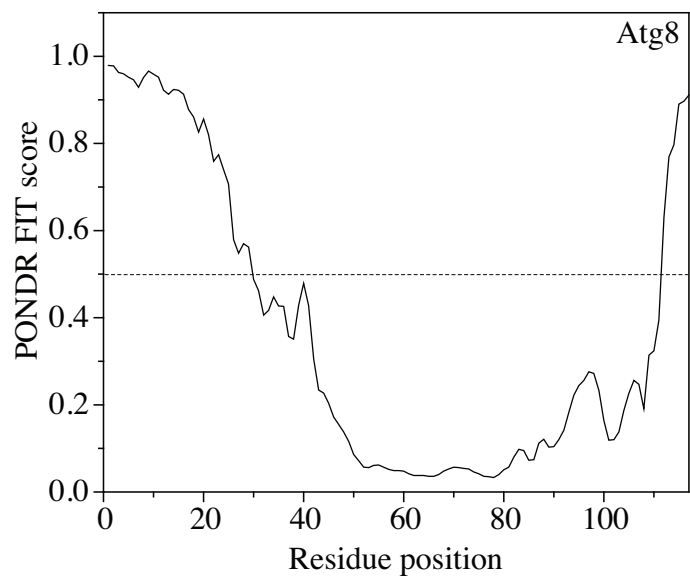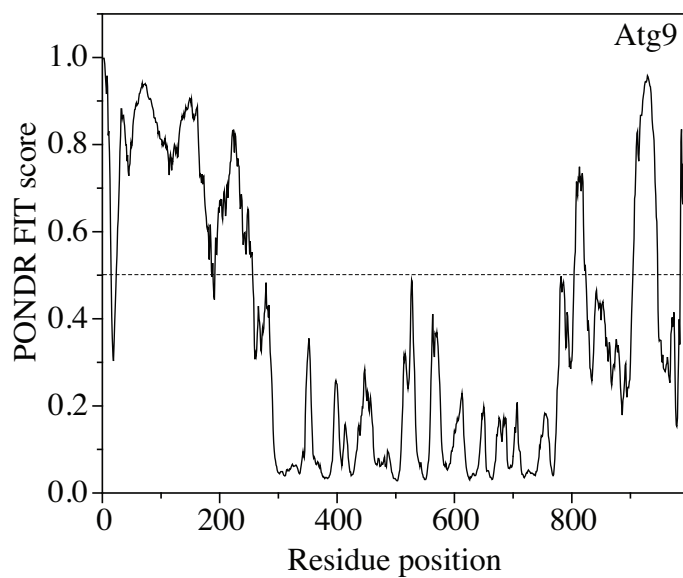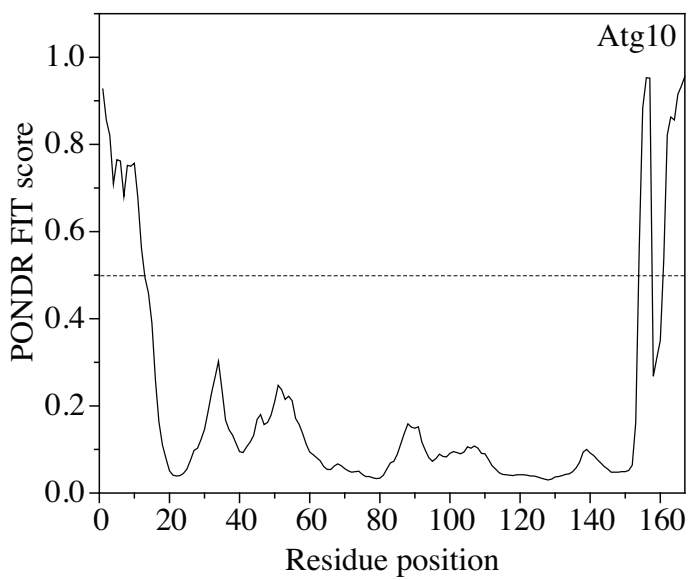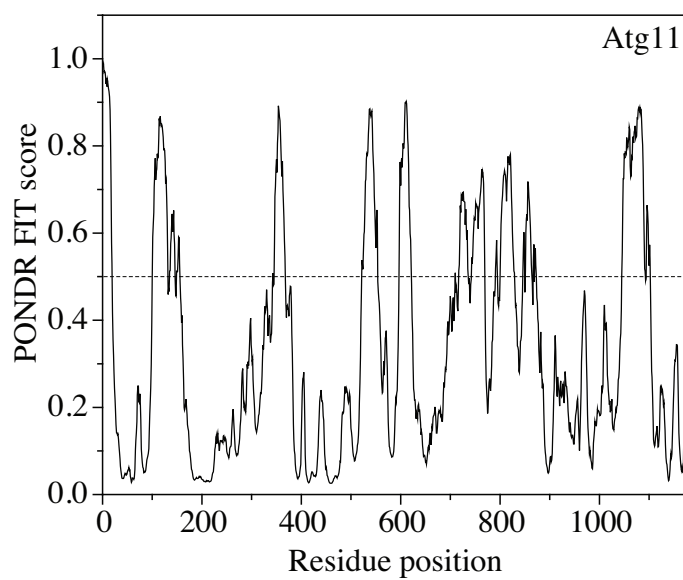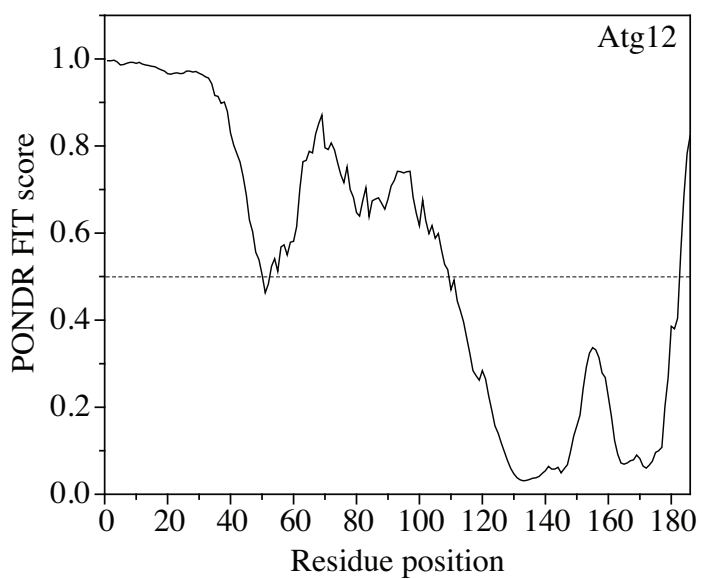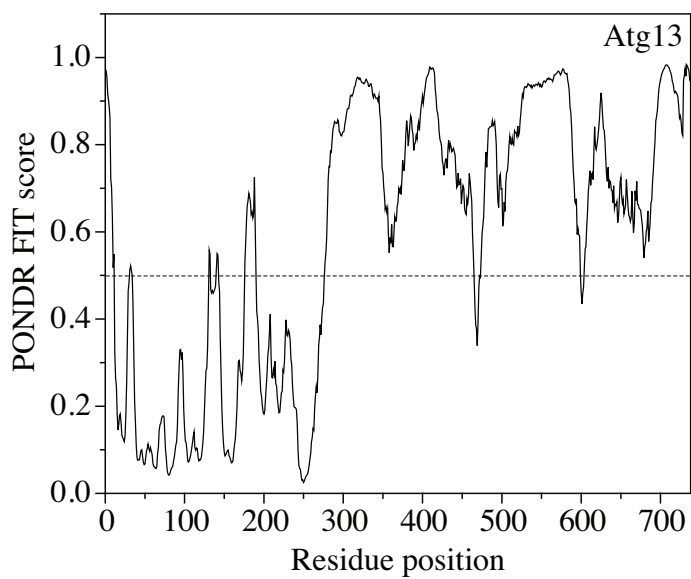

**Figure S5.** PONDR-FIT analysis of yeast Atg8, Atg9, Atg10, Atg11, Atg12, and Atg13.

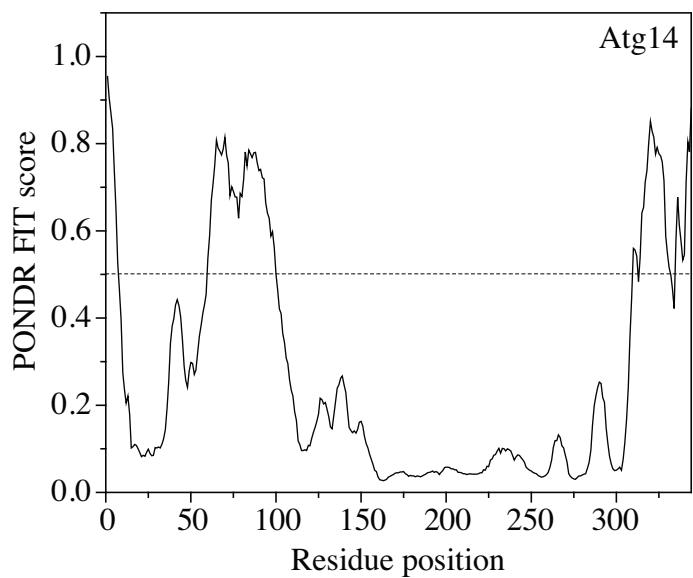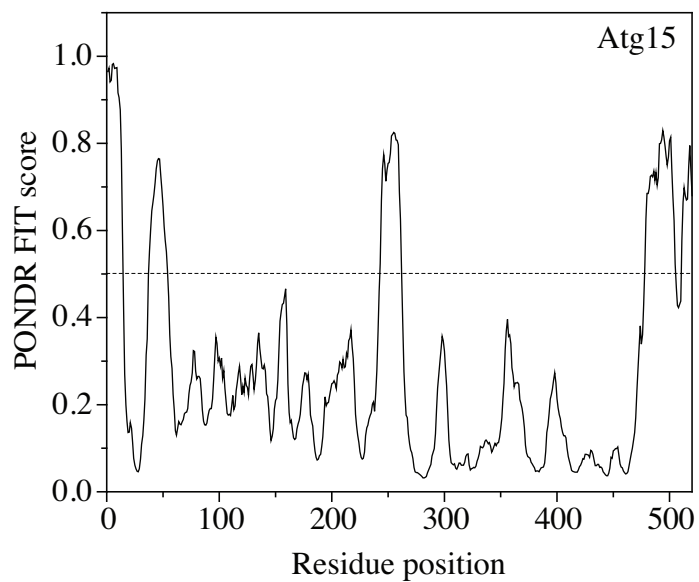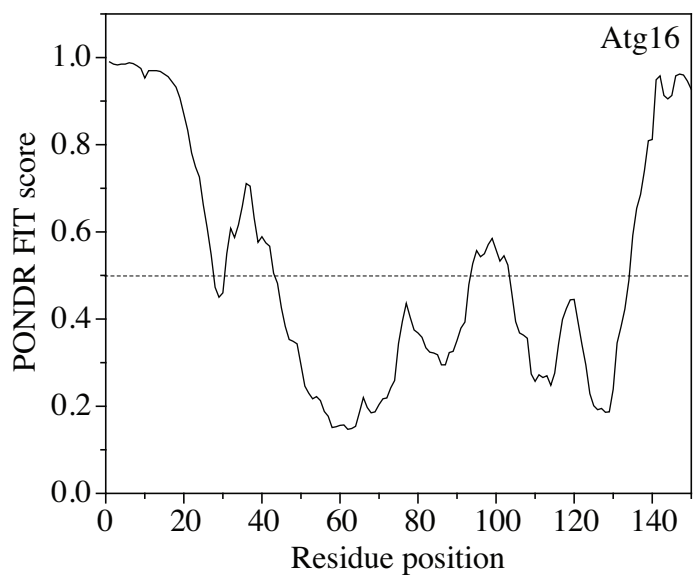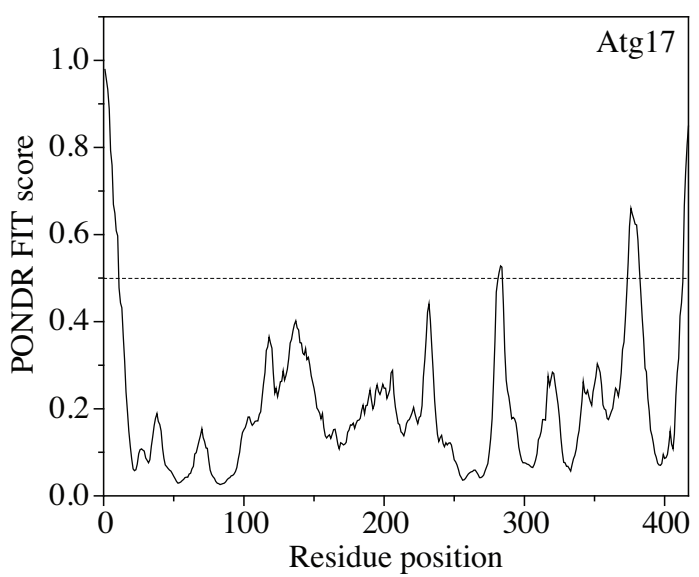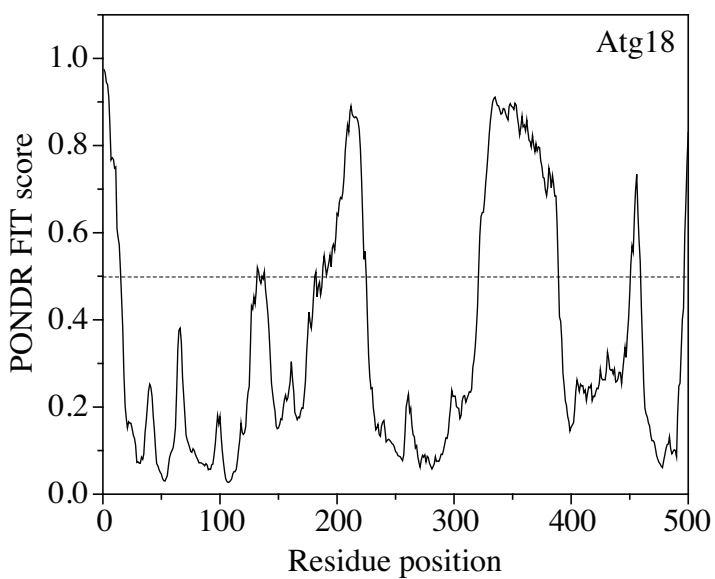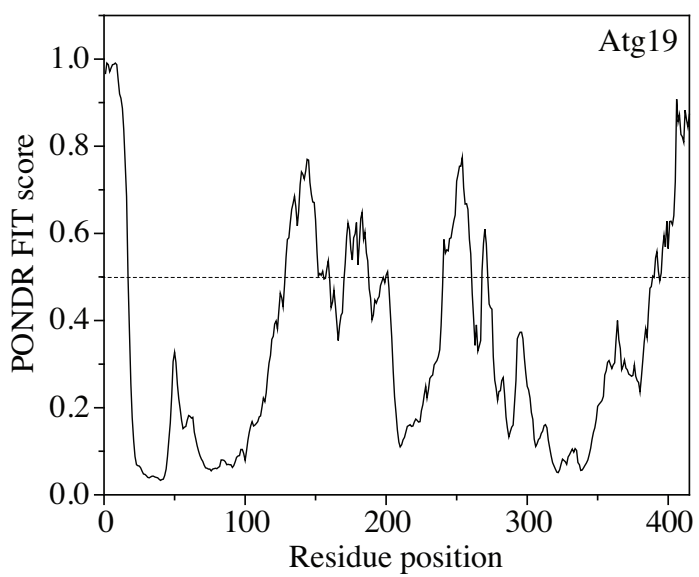

**Figure S6.** POND-RFIT analysis of yeast Atg14, Atg15, Atg16, Atg17, Atg18, and Atg19.

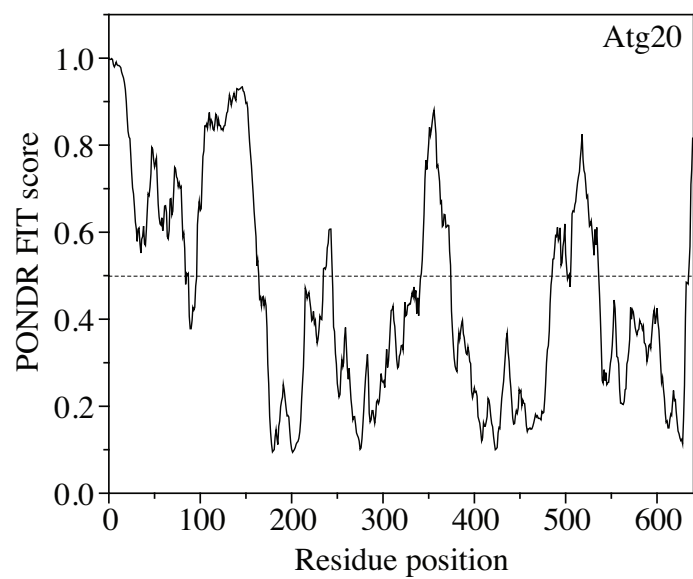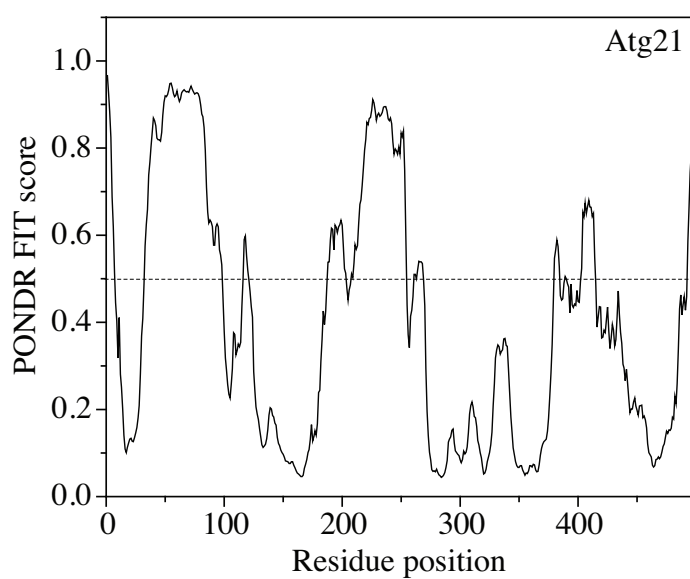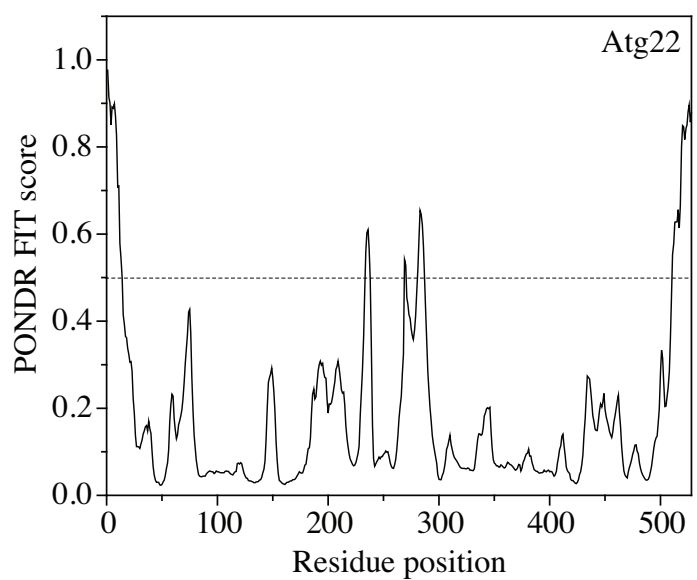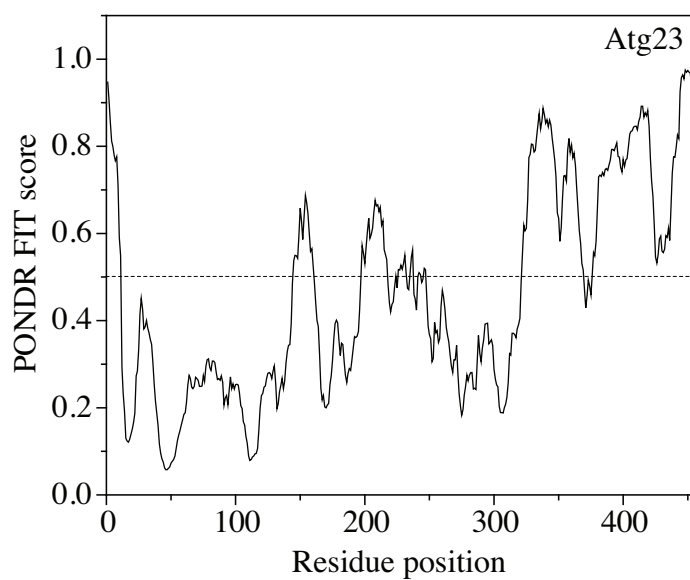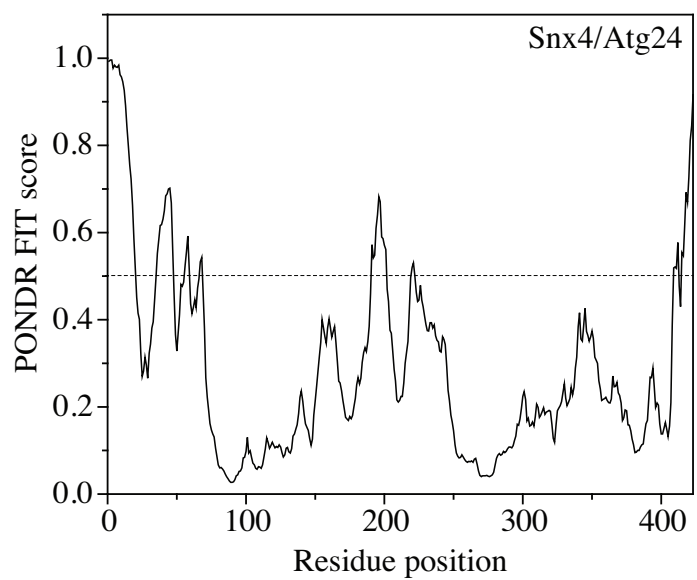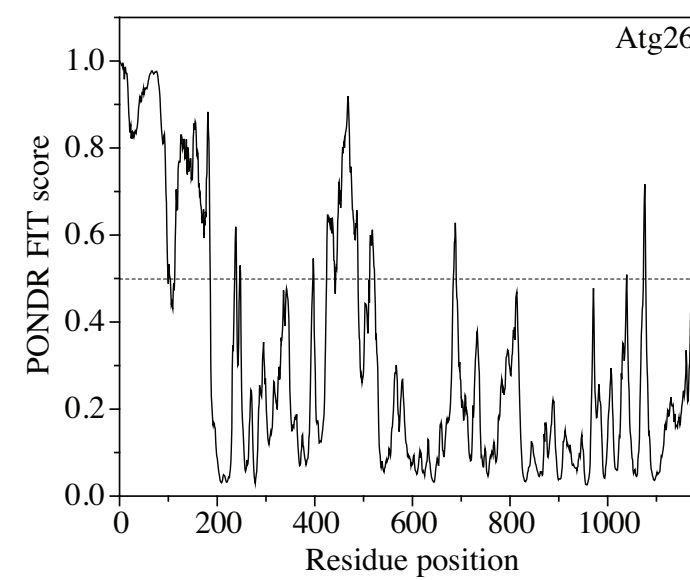

**Figure S7.** PONDR-FIT analysis of yeast Atg20, Atg21, Atg22, Atg23, Snx4/Atg24, and Atg26.



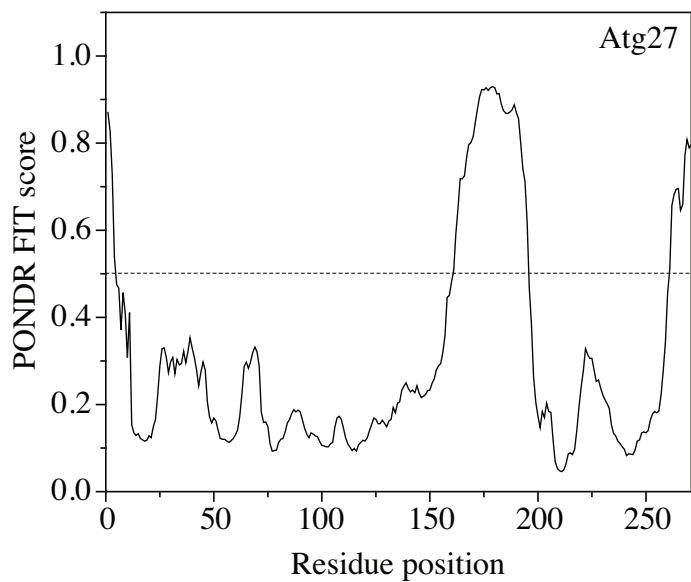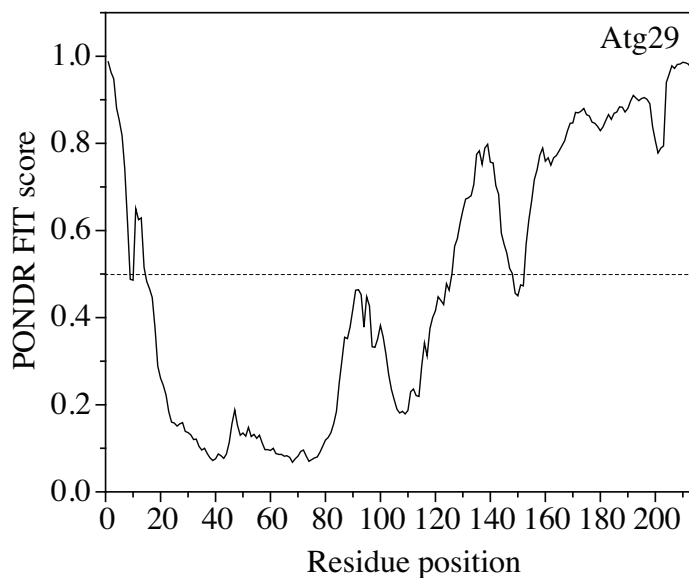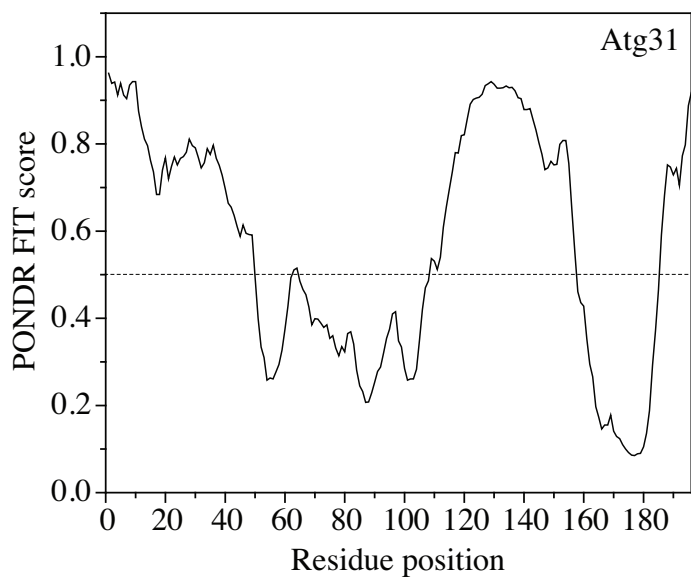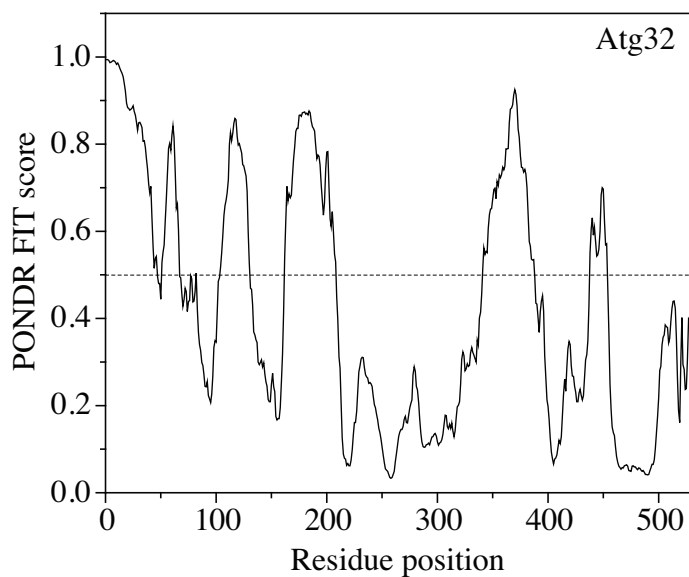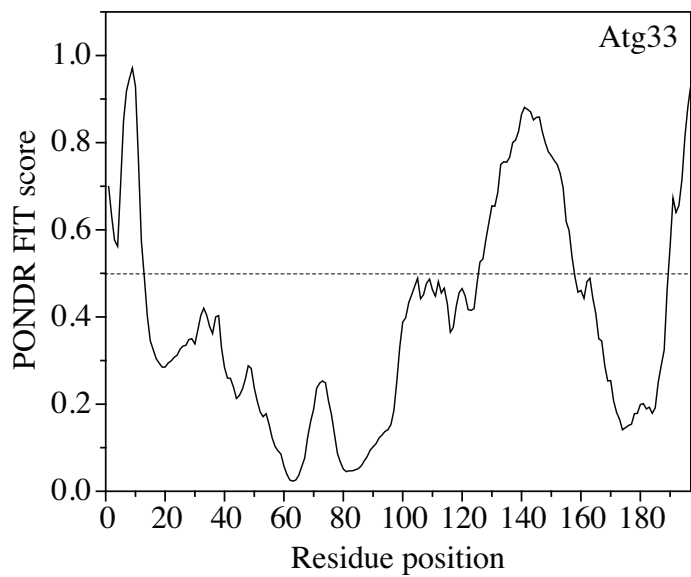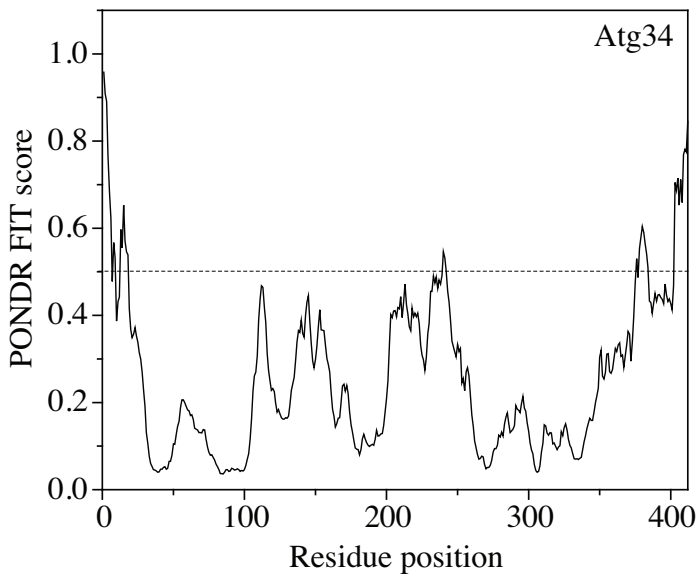

**Figure S8.** PONDR-FIT analysis of yeast Atg27, Atg29, Atg31, Atg32, Atg33, and Atg34.

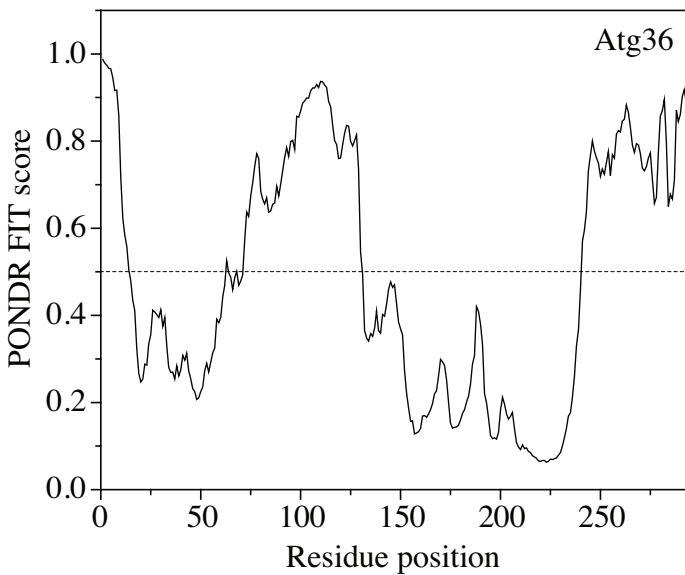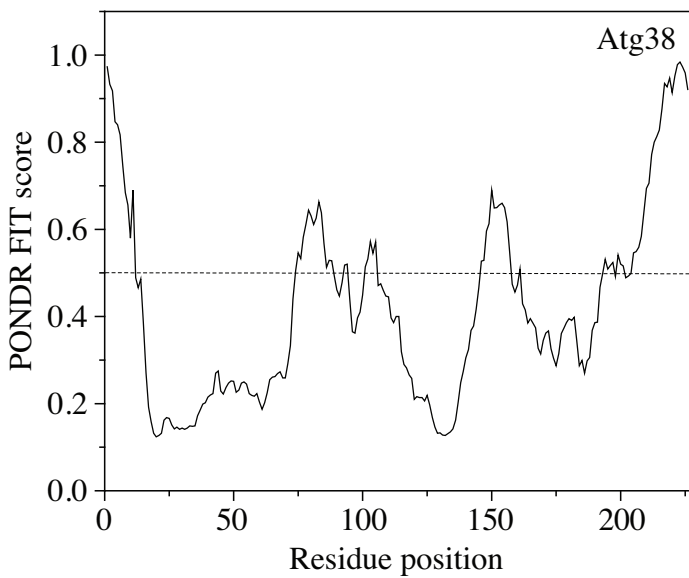

**Figure S9.** PONDR-FIT analysis of yeast Atg36 and Atg38.

10 20 30 40 50 60 70 80 90 100 (93)

Baker's yeast -----MIRSTLSSWRREYLTPTIHKSTELTTCQITPEEFVQAGDYLCHEMFTWKNNEESSDTSYRDELKPKQELIIRKVECDKRAEQCVVEGPD-VIM  
Diploid fungus -----MSLRKSLSSLRREYLTPIHNHNSNVTTCFISPEEFVKACDYLYVYKFTWQGNDCPKNLQKSFLEPDKQYLVLRHRVPSYQRASNYLTGEDDKGANP  
Roundworm of pigs MDALVKTMKSAALNVGEMLTPILRESKQKETVLTPEEFVIAADHLLVHHCPTWSWAKAADASRTKTYLDDKQFLIIRNVPCYRRCI--EMDYDPTQEKV  
Wheat -----MGQVKQKVELYEYKGTVERVTPRTVSALEKQVLSVPEFTLADNLVSKCPTWSWAGDPS-KRKEPFLPANKQFLVIRNVECLRRAVAVEEYDAAAGAEV  
Arabidopsis thaliana -----MVLSQLKHEAFKGTVERITGPRTISAKREKQVLSVSEFVLAADNLVSKCPTWSWESGDAS-KRKEPFLPANKQFLIIRNVPCLRRAASVAEDYEAAGGEV  
Corn -----MQVQKQVVEYFYKGTVERVTPRTVSALEKQVLSVPEFTLADNLVHHCPTWSWAGDPS-KRKEPFLPANKQFLVIRNVECLRRAISVEEYDAAAGAEV  
Fruit fly -----MQSVLNTVKGKALNVAEYLTPLVKESKQKRETGVITPEEFVAAADHLLVHHCPTWSWAGDDET-KTKPEYLPDKQFLVIRNVECLRRAVAVEEYDAAAGAEV  
Zebrafish -----MQNVINSVKGKALGVAEYLTPLVKESKQKRETGVITPEEFVAAADHLLVHHCPTWQWASGEEA-KVKAYLPNDKQFLIIRNVPCYKRCK--QMEYSDELEAI  
Channel catfish -----MQDVFNKVKGTALGVAEYLTPLVKESKQKRETGVITPEEFVAAADHLLVHHCPTWQWASGEEA-KVKAYLPNDKQFLIIRNVPCYKRCK--QMEYSDELEAI  
Frog -----MQSVINTVKGKALEVAEYLTPLVKESKQKRETGVITPEEFVAAADHLLVHHCPTWQWASGEEA-KVKAYLPNDKQFLIIRNVPCYKRCK--QMEYSDELEAI  
King cobra -----MQNVINTVKGKALEVAEYLTPLVKESKQKRETGVITPEEFVAAADHLLVHHCPTWQWATGEEL-KVKAYLPNDKQFLVIRNVECLRRAISVEEYDAAAGAEV  
Red Junglefowl -----MQNVINTVKGKALEVAEYLTPLVKESKQKRETGVITPEEFVAAADHLLVHHCPTWQWASGEEA-KVKAYLPNDKQFLVIRNVECLRRAISVEEYDAAAGAEV  
Mouse -----MQNVINTVKGKALEVAEYLTPLVKESKQKRETGVITPEEFVAAADHLLVHHCPTWQWATGEEL-KVKAYLPNDKQFLVIRNVECLRRAISVEEYDAAAGAEV  
Rat -----MQNVINTVKGKALEVAEYLTPLVKESKQKRETGVITPEEFVAAADHLLVHHCPTWQWATGEEL-KVKAYLPNDKQFLVIRNVECLRRAISVEEYDAAAGAEV  
Rhesus macaque -----MQNVINTVKGKALEVAEYLTPLVKESKQKRETGVITPEEFVAAADHLLVHHCPTWQWATGEEL-KVKAYLPNDKQFLVIRNVECLRRAISVEEYDAAAGAEV  
Chimpanzee -----MQNVINTVKGKALEVAEYLTPLVKESKQKRETGVITPEEFVAAADHLLVHHCPTWQWATGEEL-KVKAYLPNDKQFLVIRNVECLRRAISVEEYDAAAGAEV  
Human -----MQNVINTVKGKALEVAEYLTPLVKESKQKRETGVITPEEFVAAADHLLVHHCPTWQWATGEEL-KVKAYLPNDKQFLVIRNVECLRRAISVEEYDAAAGAEV

110 120 130 140 150 160 170 (125) 180 190 200

Baker's yeast -----KG-----FAEDGDEDDV-----LEYIGSETEHVQSTPAGG-----TKDSSIDDTELIQDMIEKBEEDND-----  
Diploid fungus -----EE-----DDEEEEEDE-----EGWVKSKKIHKVIDDTHDS-----QINKGEEINDTDDFDENAEQEQHDQIGDH-----  
Roundworm of pigs -----LITNAEMGVVEGFDGADDDGGWVDT-----HFFAPESALQKPV-----MDEPATTEPEVATG-----NASADDDGPAMDMSFIDSGLEQDDPN-----  
Wheat -----VLDDD-----EDGEGLWAT-----HGLQASESKEEEDIPSMDT-LDIGKVEEIKSIPSYFGASEKPDDEEDIPDMOTYEDTG-----DHSTATPOP-----  
Arabidopsis thaliana -----LVDD-----EDNDGLWAT-----HGKPKDKGKEEDNLPSMDA-LDINEKNTQSIPTFYFGE-----EDDDIPDMEEFDEADNVNENDPATLQS-----  
Corn -----VLD-----EDGEGLWAT-----HGVAQSKTEEEDIPSMDT-LDIGRSDGKLSIPSYFSGG-KDEEEDIPDMOTYEDTG-----DN-LAAAEF-----  
Fruit fly -----VE-----EESGGGGVETHQLNDGTTQLEDKICELTMEETKEEMHTPDSKSAAGGQAEDEDDDEAIDMDFEESGMLLELVDPAVATTRKP-----  
Zebrafish -----IE-----EDDGGGGWVDT-----FHNSGGVTGTEAVREISLDN-KDNMNMVKTGACGNSG-DEEEDIPDMOTYEDTG-----DDEEEDIPDMOTYEDTG-----  
Channel catfish -----IE-----EDDGGGGWVDT-----FHNSGGVTGTEAVREISLDN-KDNMNMVKTGACGNSG-DEEEDIPDMOTYEDTG-----DDEEEDIPDMOTYEDTG-----  
Frog -----IE-----EDDGGGGWVDT-----FHNSGGVTGTEAVREISLDN-KDNMNMVKTGACGNSG-DEEEDIPDMOTYEDTG-----DDEEEDIPDMOTYEDTG-----  
King cobra -----IE-----EDDGGGGWVDT-----FHNSGGVTGTEAVREISLDN-KDNMNMVKTGACGNSG-DEEEDIPDMOTYEDTG-----DDEEEDIPDMOTYEDTG-----  
Red Junglefowl -----IE-----EDDGGGGWVDT-----FHNSGGVTGTEAVREISLDN-KDNMNMVKTGACGNSG-DEEEDIPDMOTYEDTG-----DDEEEDIPDMOTYEDTG-----  
Mouse -----IE-----EDDGGGGWVDT-----FHNSGGVTGTEAVREISLDN-KDNMNMVKTGACGNSG-DEEEDIPDMOTYEDTG-----DDEEEDIPDMOTYEDTG-----  
Rat -----IE-----EDDGGGGWVDT-----FHNSGGVTGTEAVREISLDN-KDNMNMVKTGACGNSG-DEEEDIPDMOTYEDTG-----DDEEEDIPDMOTYEDTG-----  
Rhesus macaque -----IE-----EDDGGGGWVDT-----FHNSGGVTGTEAVREISLDN-KDNMNMVKTGACGNSG-DEEEDIPDMOTYEDTG-----DDEEEDIPDMOTYEDTG-----  
Chimpanzee -----IE-----EDDGGGGWVDT-----FHNSGGVTGTEAVREISLDN-KDNMNMVKTGACGNSG-DEEEDIPDMOTYEDTG-----DDEEEDIPDMOTYEDTG-----  
Human -----IE-----EDDGGGGWVDT-----FHNSGGVTGTEAVREISLDN-KDNMNMVKTGACGNSG-DEEEDIPDMOTYEDTG-----DDEEEDIPDMOTYEDTG-----

210 220 230 (170) 240 250 260 270 280 290 300 (240)

Baker's yeast -----DTEEFNAKGGGLAKD-MAQERYLDLITAVSTSVRVPKMYIVGFNSGSLSPQMGEDISADVTRKTAATIEKLPFYKNSVLVSIHPCCKHANVM  
Diploid fungus -----ELDDDEFNDLIDINLKSNNKLRRLDLYITVSTSVRVPKLYLGGDFNSGILPLPQCMFEDINSDVTRKTAATIEKLPFYKNSVLVSIHPCCKHANVM  
Roundworm of pigs -----RFIPTNRVMCGSQG-----DTIIHTRTYDLEITVYDKYQVPRVWLGGYDQAKKPLSVEKMNEDFSODHANKTITITHTPHLHN-TQMASIHPCRHAQVM  
Wheat -----SYFVAEEPDD-----DNILHTRTYDLEITVYDKYQVPRVWLGGYDQAKKPLSVEKMNEDFSODHANKTITITHTPHLHN-TQMASIHPCRHAQVM  
Arabidopsis thaliana -----TYLVAHEPDD-----DNILHTRTYDLEITVYDKYQVPRVWLGGYDQAKKPLSVEKMNEDFSODHANKTITITHTPHLHN-TQMASIHPCRHAQVM  
Corn -----SYFVAEEPDD-----DNILHTRTYDLEITVYDKYQVPRVWLGGYDQAKKPLSVEKMNEDFSODHANKTITITHTPHLHN-TQMASIHPCRHAQVM  
Fruit fly -----EPEAKASPVAAASGDAEASGDSVLHTRTYDLEITVYDKYQVPRVWLGGYDQAKKPLSVEKMNEDFSODHANKTITITHTPHLHN-TQMASIHPCRHAQVM  
Zebrafish -----KMAADLSKTKAEAGG-EDAILQTRTYDLEITVYDKYQVPRVWLGGYDQAKKPLSVEKMNEDFSODHANKTITITHTPHLHN-TQMASIHPCRHAQVM  
Channel catfish -----KMAADLSKTKAEAGG-EDAILQTRTYDLEITVYDKYQVPRVWLGGYDQAKKPLSVEKMNEDFSODHANKTITITHTPHLHN-TQMASIHPCRHAQVM  
Frog -----KMAADLSKTKAEAGG-EDAILQTRTYDLEITVYDKYQVPRVWLGGYDQAKKPLSVEKMNEDFSODHANKTITITHTPHLHN-TQMASIHPCRHAQVM  
King cobra -----KMAADLSKTKAEAGG-EDAILQTRTYDLEITVYDKYQVPRVWLGGYDQAKKPLSVEKMNEDFSODHANKTITITHTPHLHN-TQMASIHPCRHAQVM  
Red Junglefowl -----KMAADLSKTKAEAGG-EDAILQTRTYDLEITVYDKYQVPRVWLGGYDQAKKPLSVEKMNEDFSODHANKTITITHTPHLHN-TQMASIHPCRHAQVM  
Mouse -----KMAADLSKTKAEAGG-EDAILQTRTYDLEITVYDKYQVPRVWLGGYDQAKKPLSVEKMNEDFSODHANKTITITHTPHLHN-TQMASIHPCRHAQVM  
Rat -----KMAADLSKTKAEAGG-EDAILQTRTYDLEITVYDKYQVPRVWLGGYDQAKKPLSVEKMNEDFSODHANKTITITHTPHLHN-TQMASIHPCRHAQVM  
Rhesus macaque -----KMAADLSKTKAEAGG-EDAILQTRTYDLEITVYDKYQVPRVWLGGYDQAKKPLSVEKMNEDFSODHANKTITITHTPHLHN-TQMASIHPCRHAQVM  
Chimpanzee -----KMAADLSKTKAEAGG-EDAILQTRTYDLEITVYDKYQVPRVWLGGYDQAKKPLSVEKMNEDFSODHANKTITITHTPHLHN-TQMASIHPCRHAQVM  
Human -----KMAADLSKTKAEAGG-EDAILQTRTYDLEITVYDKYQVPRVWLGGYDQAKKPLSVEKMNEDFSODHANKTITITHTPHLHN-TQMASIHPCRHAQVM

310 320 330 340 350 360 370 380 (307)

Baker's yeast -----KILLLDKVRVVR---QRRRRELQEEQELDGVGD-----WEDLQDDIDDSLVRVQVLLIHLKHTITSVTPSFOHDYTMEGW-----  
Diploid fungus -----KVLMLKHSKLNKKNLQOKDESLSDDLKSLSVNEKKTQDEHSQINNDREEEEEGRGDHMLIIFLKFITASDTPMEYEVYTMDDAL-----  
Roundworm of pigs -----KRLLEQLAESG-----KELTVEHVLIIIFLKFVQAVIPPTIEYDYTRSIQL-----  
Wheat -----KKIIDVIVSQG-----GAPEVDKLEIIFLKFEMASVIPPTIEYDYTMDFDLGSTST-----  
Arabidopsis thaliana -----KKIIDVIMSRG-----VEPEVDKLEIIFLKFEMASVIPPTIEYDYTMDFDLGSSST-----  
Corn -----KKIIDVPMSSG-----VEPEVDKLEIIFLKFEMASVIPPTIEYDYTMDFDLGSSST-----  
Fruit fly -----KKIITQVVEEGG-----GQLGVHMLLIIIFLKFVQAVIPPTIEYDYTRHFTM-----  
Zebrafish -----KKIITQVVEEGG-----GQLGVHMLLIIIFLKFVQAVIPPTIEYDYTRHFTM-----  
Channel catfish -----KKIITQVVEEGG-----GQLGVHMLLIIIFLKFVQAVIPPTIEYDYTRHFTM-----  
Frog -----KKIITQVVEEGG-----GQLGVHMLLIIIFLKFVQAVIPPTIEYDYTRHFTM-----  
King cobra -----KKIITQVVEEGG-----GQLGVHMLLIIIFLKFVQAVIPPTIEYDYTRHFTM-----  
Red Junglefowl -----KKIITQVVEEGG-----GQLGVHMLLIIIFLKFVQAVIPPTIEYDYTRHFTM-----  
Mouse -----KKIITQVVEEGG-----GQLGVHMLLIIIFLKFVQAVIPPTIEYDYTRHFTM-----  
Rat -----KKIITQVVEEGG-----GQLGVHMLLIIIFLKFVQAVIPPTIEYDYTRHFTM-----  
Rhesus macaque -----KKIITQVVEEGG-----GQLGVHMLLIIIFLKFVQAVIPPTIEYDYTRHFTM-----  
Chimpanzee -----KKIITQVVEEGG-----GQLGVHMLLIIIFLKFVQAVIPPTIEYDYTRHFTM-----  
Human -----KKIITQVVEEGG-----GQLGVHMLLIIIFLKFVQAVIPPTIEYDYTRHFTM-----

**Table S1.** Distribution of the Atg proteins from yeast in DCH-DCDF plot based on PONDR-VSL2.

| Quadrant<br>in DCH-DCDF plot | Core autophagy machinery<br>protein from <i>S. cerevisiae</i>                                                          |
|------------------------------|------------------------------------------------------------------------------------------------------------------------|
| Q1                           | <i>Atg3</i>                                                                                                            |
| Q2                           | Atg1, Atg2, Atg4, Atg5, Atg7, Atg10, Atg11,<br>Atg14, Atg15, Atg17, Atg18, Atg22, Atg26,<br><i>Atg27, Atg33, Atg34</i> |
| Q3                           | Atg6, Atg8, Atg9, Atg12, Atg19, Atg20, <i>Atg21</i> ,<br>Atg23, Atg24, Atg32, Atg36, Atg38                             |
| Q4                           | Atg13, Atg16, Atg29, Atg31                                                                                             |

Q1, structured based on CDF, unstructured based on CH; Q2, structured based on both CDF and CH; Q3, structured according to CH, unstructured based on CDF; Q4, unstructured based on both CH and CDF. The CDF function was calculated from the PONDR-VSL2 score. Proteins in italic exhibit different localizations arising from different PONDR methods.

**Table S2.** Distribution of the Atg proteins from yeast in the DCH-DCDF plot based on PONDR-VL3.

| Quadrant<br>in DCH-DCDF plot | Core autophagy machinery<br>protein from <i>S. cerevisiae</i>                                                 |
|------------------------------|---------------------------------------------------------------------------------------------------------------|
| Q1                           | -                                                                                                             |
| Q2                           | Atg1, Atg2, Atg4, Atg5, Atg7, Atg10, Atg11, Atg14,<br>Atg15, Atg17, Atg18, <i>Atg21</i> , Atg22, Atg26, Atg27 |
| Q3                           | Atg6, Atg8, Atg9, Atg12, Atg19, Atg20, Atg23,<br>Atg24, Atg32, <i>Atg33, Atg34</i> , Atg36, Atg38             |
| Q4                           | <i>Atg3</i> , Atg13, Atg16, Atg29, Atg31                                                                      |

Q1, structured based on CDF, unstructured based on CH; Q2, structured based on both CDF and CH; Q3, structured according to CH, unstructured based on CDF; Q4, unstructured based on both CH and CDF. The CDF function was calculated from the PONDR-VL3 score. Proteins in italic exhibit different localizations arising from different PONDR methods.

**Table S3.** IDPRs of Atg proteins from yeast as predicted by PONDR-FIT.

| Protein | IDPRs of $\geq 30$ consecutive disordered residues |
|---------|----------------------------------------------------|
| Atg1    | 353-390; 455-560; 632-668                          |
| Atg2    | 122-167; 255-295; 970-1027                         |
| Atg3    | 110-165                                            |
| Atg6    | 88-170; 213-303                                    |
| Atg8    | 1-30                                               |
| Atg9    | 24-256; 904-946                                    |
| Atg11   | 100-156; 524-554; 717-769; 791-828; 1045-1102      |
| Atg12   | 1-110                                              |
| Atg13   | 276-465; 473-738                                   |
| Atg14   | 60-100; 310-344                                    |
| Atg16   | 1-44                                               |
| Atg18   | 181-225; 321-389                                   |
| Atg19   | 128-160                                            |
| Atg20   | 1-87; 96-164; 341-374; 485-536                     |
| Atg21   | 32-98; 187-254                                     |
| Atg23   | 321-453                                            |
| Atg26   | 1-100; 111-186; 424-489                            |
| Atg27   | 160-196                                            |
| Atg29   | 126-213                                            |
| Atg31   | 1-50; 108-158                                      |
| Atg32   | 1-68; 102-132; 162-208; 341-388                    |
| Atg33   | 125-158                                            |
| Atg36   | 63-131; 240-293                                    |
| Atg38   | 193-226                                            |

The residues with the PONDR-FIT score near to 0.5 or higher were considered disordered. The numbers indicate the residue position in the amino acid sequence of a particular protein.
